# Supplementary material for: Dysfunctional S1P/S1PR1 signaling in the dentate gyrus drives vulnerability of chronic pain-related memory impairment
Source: eLife journal article supplement (doi:10.7554/elife.99862), 2024-07-16
Supplement: fig5-data1 [file elife-99862-fig5-data1-v1.pdf]

Full unedited blot for Figure 5C

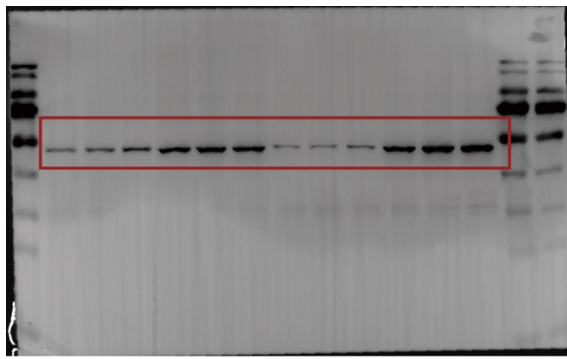

S1PR1

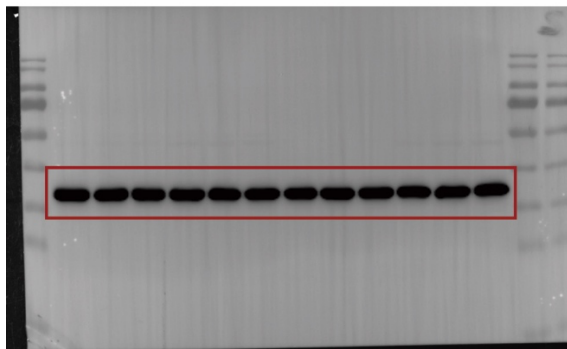

GAPDH
