# Supplementary material for: Dysfunctional S1P/S1PR1 signaling in the dentate gyrus drives vulnerability of chronic pain-related memory impairment
Source: eLife journal article supplement (doi:10.7554/elife.99862), 2024-07-16

### Full unedited blot for Figure 8C

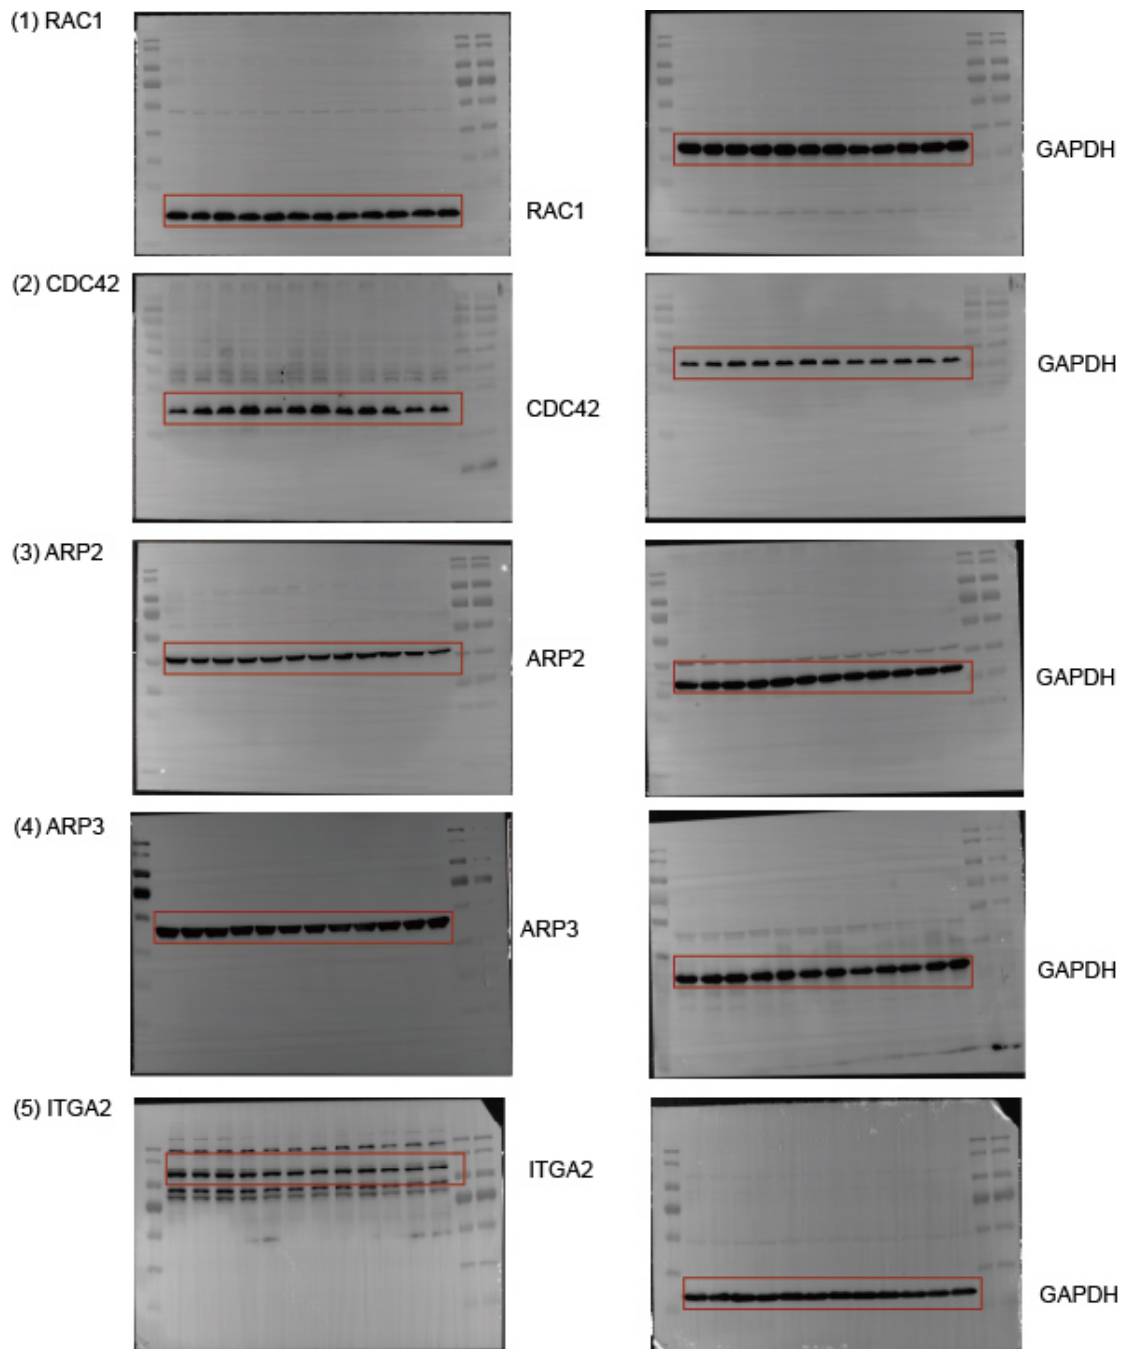

## Full unedited blot for Figure 8E

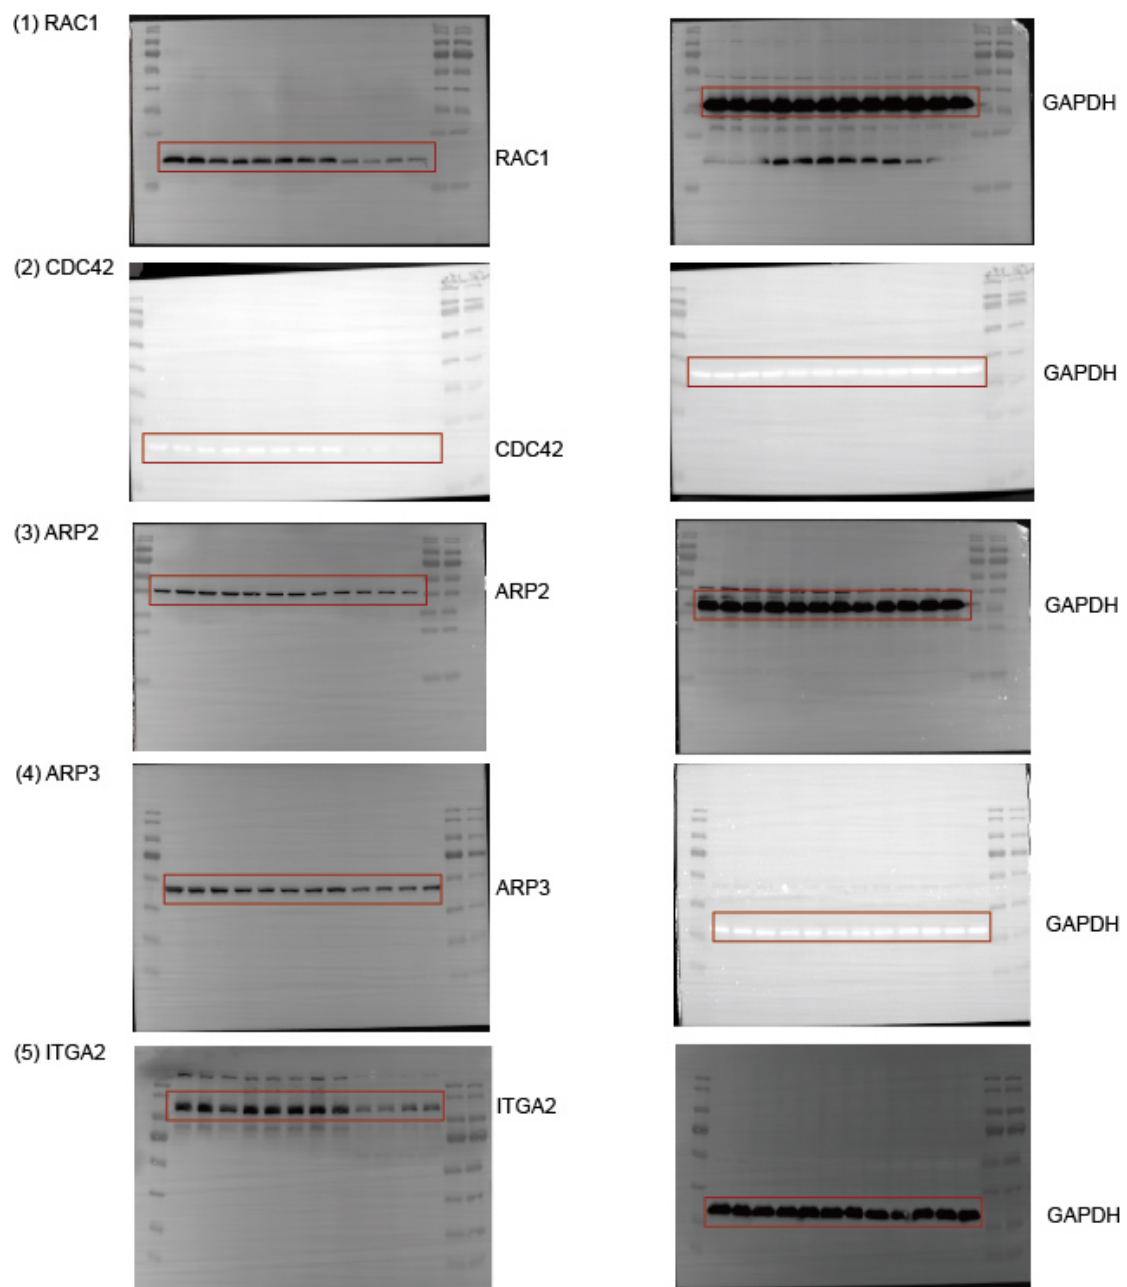

## Full unedited blot for Figure 8G

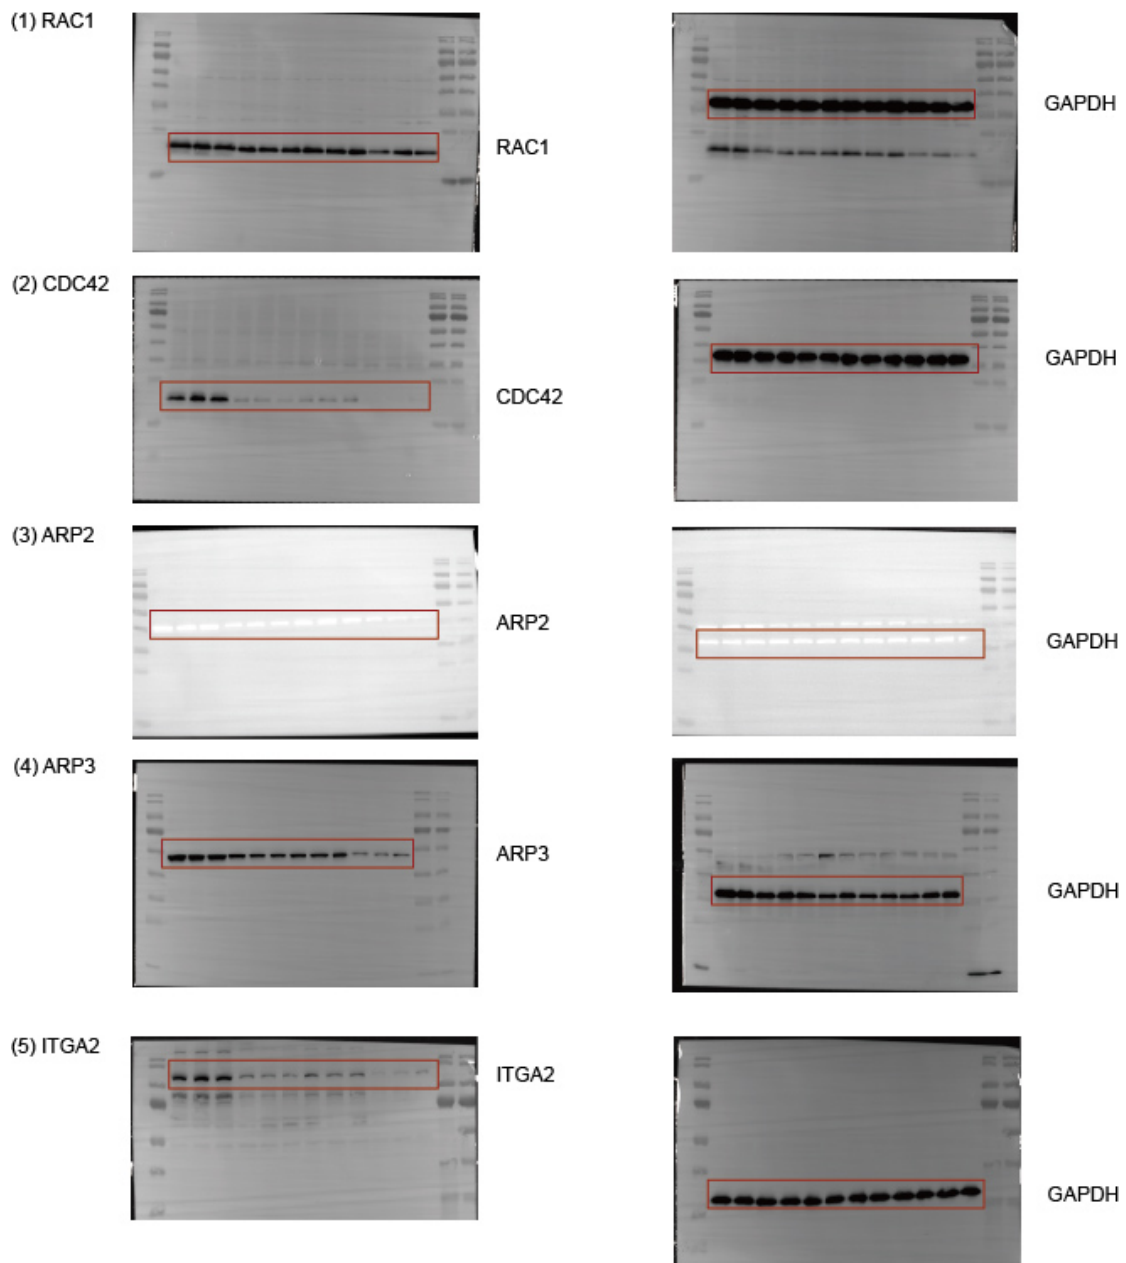

**Full unedited blot for Figure 8I**

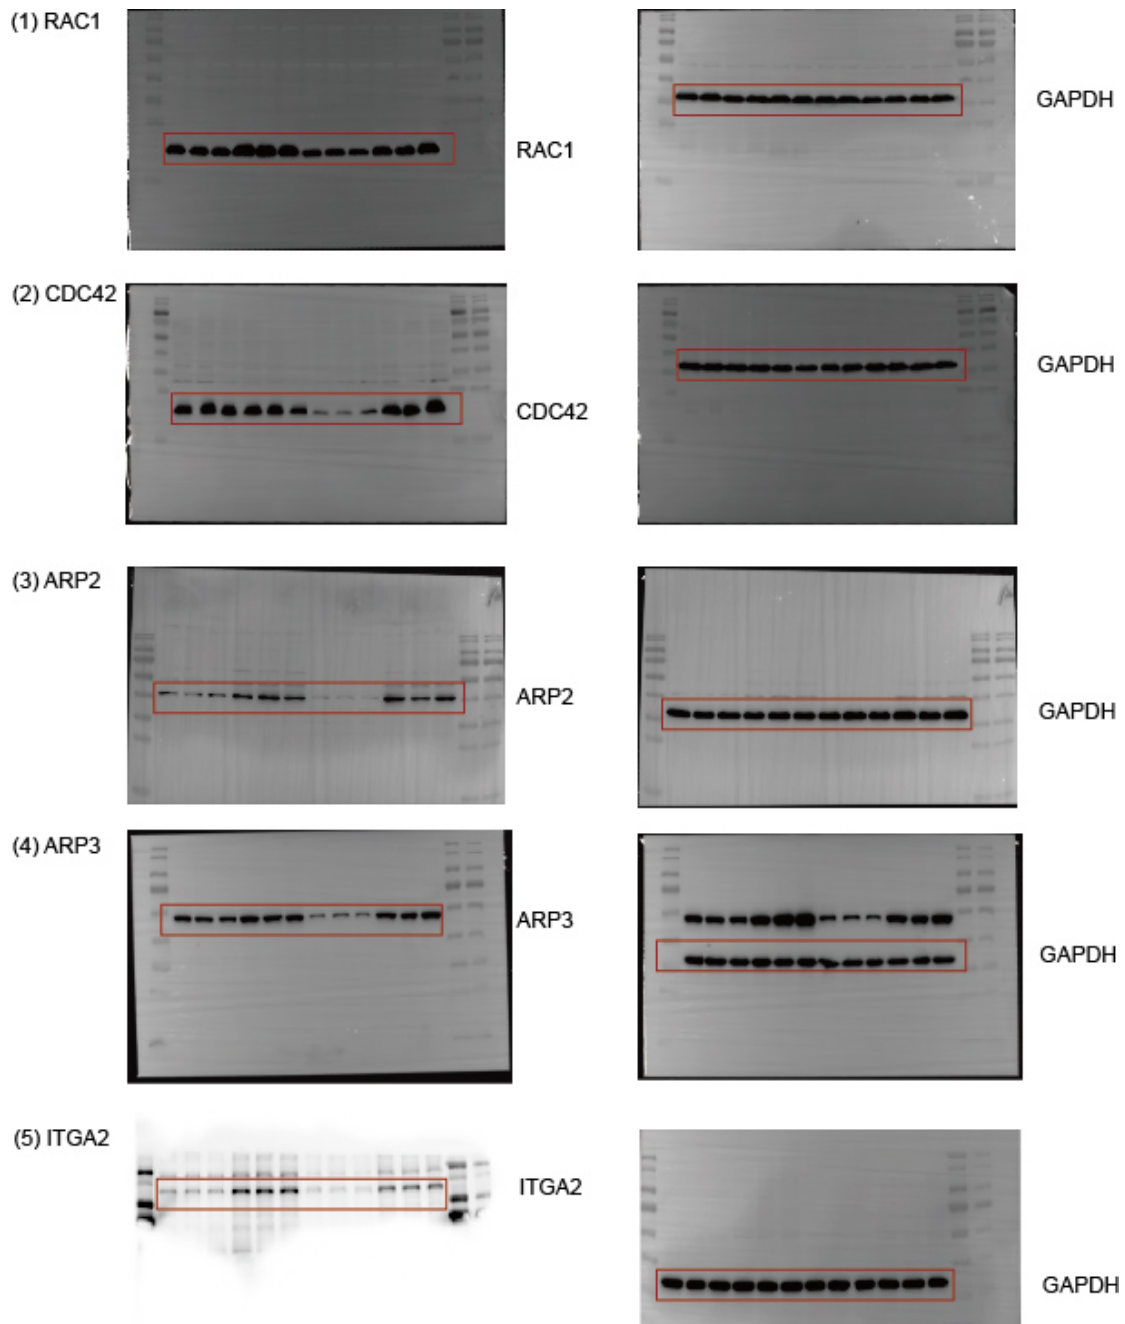

Supplement: fig8-data1 [file elife-99862-fig8-data1-v1.pdf]
