# Supplementary material for: Dysfunctional S1P/S1PR1 signaling in the dentate gyrus drives vulnerability of chronic pain-related memory impairment
Source: eLife journal article supplement (doi:10.7554/elife.99862), 2024-07-16
Supplement: fig8-figsupp1-data1 [file elife-99862-fig8-figsupp1-data1-v1.pdf]

CCI-Acute

(1) RhoA

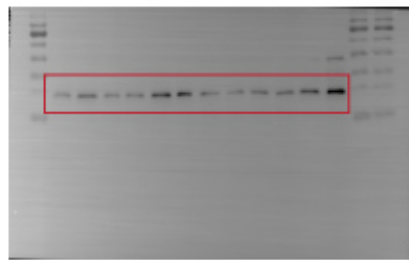

RhoA

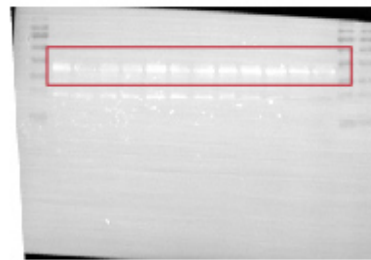

GAPDH

(2) S1PR2

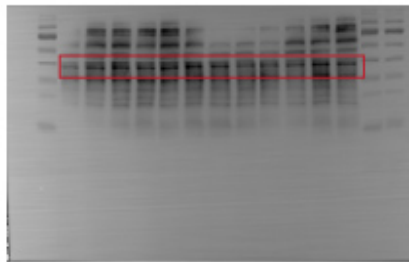

S1PR2

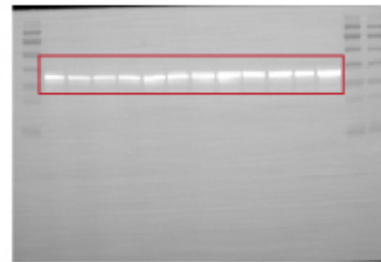

GAPDH

CCI-Chronic

(1) RhoA

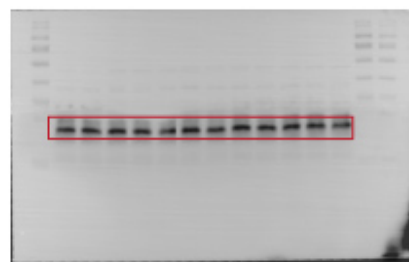

RhoA

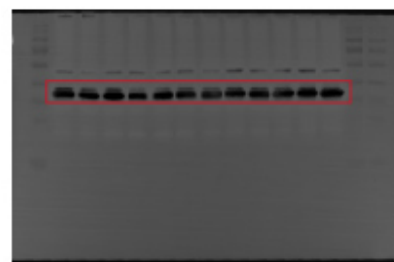

GAPDH

(2) S1PR2

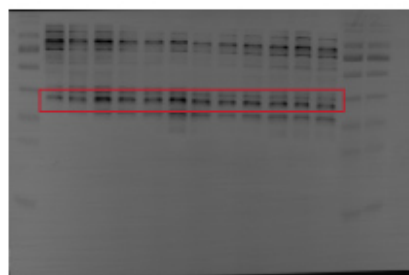

S1PR2

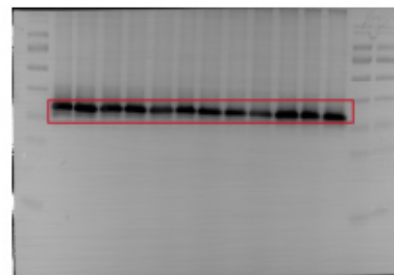

GAPDH
