# Supplementary material for: Dysfunctional S1P/S1PR1 signaling in the dentate gyrus drives vulnerability of chronic pain-related memory impairment
Source: eLife journal article supplement (doi:10.7554/elife.99862), 2024-07-16
Supplement: fig9-figsupp1-data1 [file elife-99862-fig9-figsupp1-data1-v1.pdf]

Unedited gel for pBT3-STE-s1pr1 plasmid digested with XbaI-HindIII.

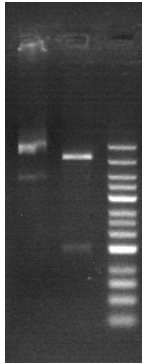

Lane 1: empty plasmid control.

Lane 2: plasmid digested with restriction enzymes

Lane 3: DNA ladder

Unedited gel for pPR3-C-itga2 plasmid digested with Sall-BamHI.

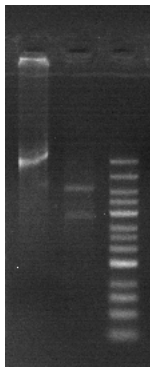

Lane 1: empty plasmid control.

Lane 2: plasmid digested with restriction enzymes

Lane 3: DNA ladder
