# Supplementary figures and images for: Dysfunctional S1P/S1PR1 signaling in the dentate gyrus drives vulnerability of chronic pain-related memory impairment
Source: eLife journal article supplement (doi:10.7554/elife.99862), 2024-07-16

Full unedited blot for Figure 2F

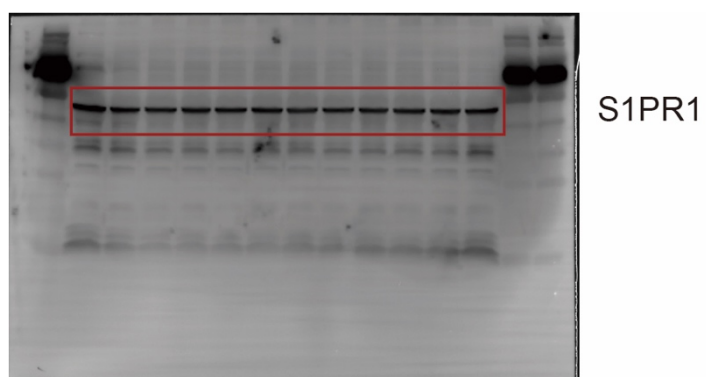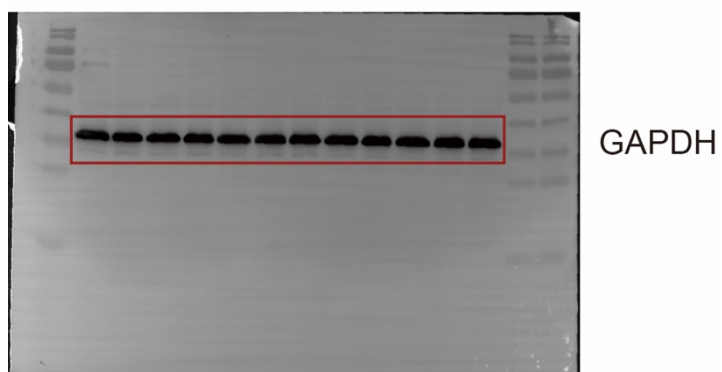

Full unedited blot for Figure 2G

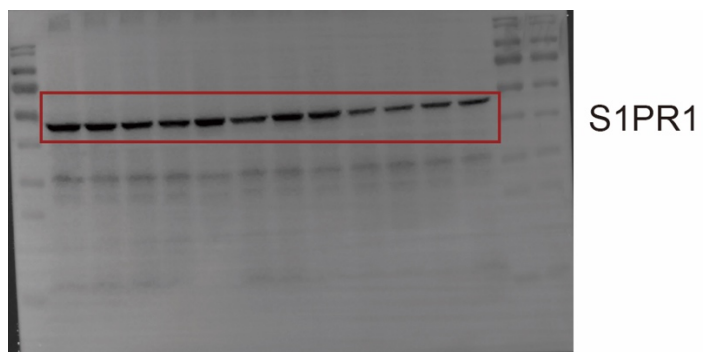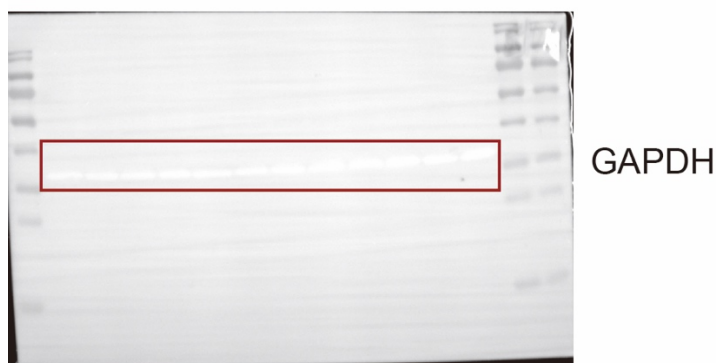

Supplement: fig2-data1 [file elife-99862-fig2-data1-v1.zip]
